# Supplementary material for: The optimization of postoperative radiotherapy in de novo stage IV breast cancer: evidence from real-world data to personalize treatment decisions
Source: Sci Rep. 2023 Feb 18;13:2880. doi: 10.1038/s41598-023-29888-z (PMC9938892; doi:10.1038/s41598-023-29888-z)
Supplement: Supplementary file 2 — Supplementary Information 2. [file 41598_2023_29888_MOESM2_ESM.xlsx]

## Sheet: SuppleTable 1
Supplemental Table 1. Patient characteristics among groups with / without breast surgery and radiotherapy (N=54,413)
Variables	No Surgery, No RT (N=37753 )					No Surgery, RT (N=1481 )					Surgery, No RT (N=10491)					Surgery, RT (N=4688)				P value
	N		%			N		%			N		%			N		%
Age (years)																				<0.001
median (range)	63 (19-90)					63 (24-90)					60 (18-90)					55 (18-90)
<34	825		2.18526			24		1.62053			347		3.3076			265		5.65273
35-39	960		2.54284			25		1.68805			448		4.27033			290		6.18601
40-44	1580		4.1851			59		3.98379			613		5.8431			373		7.95648
45-49	2618		6.93455			107		7.22485			944		8.99819			564		12.0307
50-54	3953		10.4707			182		12.289			1235		11.772			730		15.5717
55-59	4960		13.138			192		12.9642			1398		13.3257			667		14.2278
60-64	5479		14.5128			217		14.6523			1447		13.7928			624		13.3106
65-69	4910		13.0056			189		12.7616			1291		12.3058			478		10.1962
70-74	3861		10.227			155		10.4659			944		8.99819			324		6.91126
75-79	3212		8.50793			107		7.22485			756		7.20618			206		4.3942
80-84	2643		7.00077			100		6.75219			589		5.61434			107		2.28242
85-	2752		7.28949			124		8.37272			479		4.56582			60		1.27986
Race																				<0.001
White	29386		77.8375			1035		69.8852			8385		79.9257			3682		78.541
Black	6577		17.4211			355		23.9703			1618		15.4227			744		15.8703
Others	1449		3.83811			79		5.33423			423		4.03203			232		4.94881
Unknown	341		0.903239			12		0.810263			65		0.619579			30		0.639932
Charlson-Deyo score																				<0.001
0	29861		79.0957			1212		81.8366			8369		79.7731			4059		86.5828
1	5617		14.8783			205		13.842			1593		15.1844			527		11.2415
2 or more	2275		6.02601			64		4.3214			529		5.04242			102		2.17577
cT																				<0.001
0, is	1044		2.76534			27		1.82309			49		0.467067			22		0.469283
1	4598		12.1792			70		4.72654			1753		16.7096			525		11.1988
2	9050		23.9716			138		9.31803			3492		33.2857			1367		29.1596
3	4610		12.211			131		8.84537			1458		13.8976			803		17.1288
4	10518		27.86			932		62.9305			2440		23.258			1664		35.4949
Unknown	7933		21.0129			183		12.3565			1299		12.382			307		6.54863
cN																				<0.001
0	8940		23.6802			197		13.3018			3494		33.3047			883		18.8353
1	14565		38.5797			507		34.2336			3485		33.2189			1838		39.2065
2	3451		9.141			254		17.1506			1119		10.6663			729		15.5503
3	4000		10.5952			359		24.2404			1020		9.72262			903		19.2619
Unknown	6797		18.0039			164		11.0736			1373		13.0874			335		7.1459
Grade																				<0.001
1,2	13819		36.6037			412		27.819			4206		40.0915			1830		39.0358
3,4	11488		30.4294			701		47.3329			5336		50.8626			2445		52.1544
Unknown	12446		32.9669			368		24.8481			949		9.04585			413		8.80973
ER																				<0.001
Positive	26451		70.0633			952		64.2809			7396		70.4985			3313		70.6698
Negative	7684		20.3533			469		31.6678			2866		27.3187			1331		28.3916
Unknown	3618		9.58334			60		4.05132			229		2.18282			44		0.938567
PgR																				<0.001
Positive	21227		56.226			752		50.7765			6050		57.6685			2749		58.6391
Negative	12379		32.7894			661		44.632			4183		39.8723			1885		40.209
Unknown	4147		10.9846			68		4.59149			258		2.45925			54		1.15188
HER2																				<0.001
Positive	7702		20.401			302		20.3916			2463		23.4773			1296		27.6451
Negative	23685		62.7367			1008		68.0621			7309		69.6692			3165		67.5128
Unknown	6366		16.8622			171		11.5463			719		6.85349			227		4.84215
Subtypes																				<0.001
Luminal type	19274		51.0529			705		47.603			5586		53.2456			2405		51.3012
HER2 type	7524		19.9295			295		19.919			2446		23.3152			1276		27.2184
TN type	3977		10.5343			293		19.7839			1681		16.0233			736		15.6997
Unknown	6978		18.4833			188		12.6941			778		7.41588			271		5.78072
Breast surgery																				<0.001
BCS											3065		29.2155			1129		24.0828
Mastectomy											7426		70.7845			3559		75.9172
Chemotherapy																				<0.001
Yes	16976		44.966			851		57.4612			6498		61.9388			3984		84.9829
No	19861		52.6077			607		40.9858			3785		36.0785			684		14.5904
Unknown	916		2.4263			23		1.553			208		1.98265			20		0.426621
Endocrine therapy																				<0.001
Yes	19462		51.5509			765		51.6543			5748		54.7898			2933		62.564
No	17232		45.6441			682		46.05			4358		41.5404			1633		34.8336
Unknown	1059		2.80508			34		2.29575			385		3.66981			122		2.60239
Bone metastasis																				<0.001
Yes	27070		71.7029			895		60.4321			6393		60.9379			2473		52.7517
No	10368		27.4627			577		38.9602			4026		38.3758			2199		46.907
Unknown	385		1.01979			9		0.607698			72		0.686303			16		0.341297
Lung metastasis																				<0.001
Yes	12583		33.3298			629		42.4713			2744		26.1558			861		18.366
No	24339		64.469			815		55.0304			7616		72.5956			3790		80.8447
Unknown	831		2.20115			37		2.49831			131		1.24869			37		0.789249
Liver metastasis																				<0.001
Yes	10402		27.5528			351		23.7002			2245		21.3993			663		14.1425
No	26617		70.503			1102		74.4092			8132		77.5141			4001		85.3456
Unknown	734		1.94422			28		1.89061			114		1.08665			24		0.511945
Brain metastasis																				<0.001
Yes	3624		9.59924			125		8.44024			517		4.92803			75		1.59983
No	33296		88.1943			1328		89.6691			9854		93.9281			4580		97.6962
Unknown	833		2.20645			28		1.89061			120		1.14384			33		0.703925
Distant LN metastasis																				<0.001
Yes	7535		19.9587			435		29.372			1868		17.8057			1292		27.5597
No	25649		67.939			883		59.6219			7482		71.3183			2991		63.8012
Unknown	4569		12.1023			163		11.0061			1141		10.876			405		8.63908
Other metastasis																				<0.001
Yes	1957		5.18369			111		7.49494			655		6.24345			357		7.61519
No	31211		82.6716			1206		81.4315			8688		82.8138			3926		83.7457
Unknown	4585		12.1447			164		11.0736			1148		10.9427			405		8.63908
No. of metastatic site																				<0.001
1	20531		54.3824			773		52.1945			7475		71.2515			3813		81.3353
2	10783		28.562			426		28.7643			2253		21.4756			738		15.7423
3	4861		12.8758			215		14.5172			624		5.94796			118		2.51706
4 or more	1578		4.1798			67		4.52397			139		1.32495			19		0.40529
RT; radiotherapy, cT; clinical T, cN; clinical N, ER; estrogen receptor, PgR;progesterone receptor, HER2; human epidermal growth factor receptor 2, TN; triple negative, BCS; breast conserving surgery, LN; lymph node

## Sheet: SuppleTable 2
Supplemental Table 2. Univariate analysis of conditional landmark cohort (N=11,850)
Variables	N	Events	HR	95%CI (lower - upper)		P value
All patients	11850	5421
Radiotherapy
No	8221	4064	1
Yes	3629	1357	0.707	0.665	0.752	<0.001
Age (years)
<35	518	167	1
35-39	634	280	1.419	1.171	1.718	<0.001
40-44	835	340	1.241	1.031	1.494	0.022
45-49	1255	522	1.283	1.077	1.527	0.005
50-54	1629	693	1.438	1.215	1.703	<0.001
55-59	1668	764	1.517	1.283	1.794	<0.001
60-64	1637	729	1.45	1.225	1.715	<0.001
65-69	1369	626	1.523	1.284	1.806	<0.001
70-74	917	474	1.87	1.568	2.231	<0.001
75-79	674	364	2.046	1.704	2.458	<0.001
80-84	447	288	2.473	2.044	2.992	<0.001
85-	267	174	2.866	2.318	3.545	<0.001
Race
White	9415	4267	1
Black	1834	925	1.299	1.21	1.395	<0.001
Others	524	198	0.901	0.781	1.039	0.152
Charlson-Deyo score
0	9931	4351	1
1	1535	846	1.364	1.267	1.469	<0.001
2 or more	384	224	1.553	1.358	1.777	<0.001
cT
1	1797	733	1
2	3947	1736	1.14	1.046	1.243	0.003
3	1830	839	1.218	1.104	1.345	<0.001
4	3099	1568	1.437	1.317	1.569	<0.001
cN
0	3378	1474	1
1	4329	1928	1.063	0.993	1.138	0.078
2	1453	724	1.199	1.097	1.311	<0.001
3	1528	717	1.157	1.058	1.265	0.001
Grade
1, 2	4967	1959	1
3, 4	5833	2981	1.557	1.471	1.649	<0.001
Subtypes
Luminal	6458	2959	1
HER2+	3065	1067	0.745	0.694	0.799	<0.001
Triple-negative	1555	1004	2.162	2.012	2.323	<0.001
Breast surgery
BCS	3169	1380	1
Mastectomy	8681	4041	1.109	1.043	1.178	0.001
Chemotherapy
No	3149	1584	1
Yes	8560	3765	0.911	0.859	0.966	0.002
Endocrine therapy
No	4207	2144	1
Yes	7265	3122	0.682	0.646	0.721	<0.001
Bone metastasis
Yes	6979	3291	1
No	4871	2130	0.948	0.897	1.001	0.053
Lung metastasis
Yes	2511	1336	1
No	9339	4085	0.722	0.678	0.768	<0.001
Liver metastasis
Yes	2093	1102	1
No	9757	4319	0.77	0.721	0.823	<0.001
Brain metastasis
Yes	318	196	1
No	11532	5225	0.598	0.518	0.689	<0.001
Distant LN metastasis
Yes	2526	1102	1
No	8161	3755	1.027	0.961	1.099	0.431
Other metastasis
Yes	783	338	1
No	9904	4519	1.07	0.958	1.195	0.229
No. of metastatic site
1	9133	3891	1
2	2166	1181	1.408	1.319	1.503	<0.001
3 or more	551	349	1.959	1.756	2.187	<0.001
HR, hazard ratio; CI, confidential interval; cT, clinical T; cN, clinical N; BCS, breast conserving surgery; LN, lymph node

## Sheet: SuppleTable 3
Supplemental Table 3. Patient characteristics between No RT group and RT group after a propensity score matching (N=6,512)
Variables	No RT (N=3256)					RT (N=3256)				P value
	N		%			N		%
Age (years)										1
median (range)	56 (18-90)					55 (22-90)
-34	170		5.22113			167		5.12899
35-39	206		6.32678			204		6.26536
40-44	250		7.67813			259		7.95455
45-49	390		11.9779			402		12.3464
50-54	504		15.4791			497		15.2641
55-59	480		14.742			467		14.3428
60-64	424		13.0221			429		13.1757
65-69	359		11.0258			353		10.8415
70-74	223		6.84889			225		6.91032
75-79	141		4.33047			144		4.4226
80-84	76		2.33415			72		2.2113
85-	33		1.01351			37		1.13636
Race										0.335
White	2528		77.6413			2575		79.0848
Black	551		16.9226			508		15.602
Others	151		4.63759			153		4.69902
Unknown	26		0.798526			20		0.614251
Charlson-Deyo score										0.841
0	2829		86.8857			2815		86.4558
1	368		11.3022			377		11.5786
2 or more	59		1.81204			64		1.9656
cT										0.886
0, is	12		0.36855			15		0.460688
1	422		12.9607			414		12.715
2	1037		31.8489			1047		32.156
3	543		16.6769			553		16.984
4	1033		31.726			1018		31.2654
Unknown	209		6.41892			209		6.41892
cN										0.981
0	696		21.3759			695		21.3452
1	1308		40.172			1324		40.6634
2	487		14.957			485		14.8956
3	523		16.0627			514		15.7862
Unknown	242		7.43243			238		7.30958
Grade										0.733
1,2	1297		39.8342			1294		39.742
3,4	1658		50.9214			1684		51.7199
Unknown	301		9.24447			278		8.53808
ER										0.452
Positive	2336		71.7445			2311		70.9767
Negative	890		27.3342			918		28.1941
Unknown	30		0.921376			27		0.829238
PgR										0.618
Positive	1941		59.613			1925		59.1216
Negative	1277		39.2199			1299		39.8956
Unknown	38		1.16708			32		0.982801
HER2										0.847
Positive	901		27.672			905		27.7948
Negative	2208		67.8133			2194		67.3833
Unknown	147		4.51474			157		4.82187
Subtypes										0.477
Luminal type	1727		53.0405			1686		51.7813
HER2 type	898		27.5799			895		27.4877
TN type	460		14.1278			491		15.0799
Unknown	171		5.25184			184		5.65111
Breast surgery										0.67
BCS	836		25.6757			821		25.215
Mastectomy	2420		74.3243			2435		74.785
Chemotherapy										0.14
Yes	2743		84.2445			2781		85.4115
No	504		15.4791			461		14.1585
Unknown	9		0.276413			14		0.429975
Endocrine therapy										0.403
Yes	2063		63.36			2024		62.1622
No	1117		34.3059			1145		35.1658
Unknown	76		2.33415			87		2.67199
Bone metastasis										0.566
Yes	1834		56.3268			1811		55.6204
No	1422		43.6732			1445		44.3796
Lung metastasis										0.797
Yes	588		18.059			596		18.3047
No	2668		81.941			2660		81.6953
Liver metastasis										0.419
Yes	463		14.2199			486		14.9263
No	2793		85.7801			2770		85.0737
Brain metastasis			0					0		0.613
Yes	52		1.59705			47		1.44349
No	3204		98.4029			3209		98.5565
Distant LN metastasis										0.712
Yes	773		23.7408			785		24.1093
No	2190		67.2604			2176		66.8305
Unknown	293		8.99877			295		9.0602
Other metastasis										0.929
Yes	233		7.15602			231		7.09459
No	2730		83.8452			2730		83.8452
Unknown	293		8.99877			295		9.0602
No. of metastatic site										0.657
1	2673		82.0946			2665		81.8489
2	489		15.0184			498		15.2948
3	84		2.57985			79		2.42629
4 or more	10		0.307125			14		0.429975
RT; radiotherapy, cT; clinical T, cN; clinical N, ER; estrogen receptor, PgR;progesterone receptor, HER2; human epidermal growth factor receptor 2, TN; triple negative, BCS; breast conserving surgery, LN; lymph node

## Sheet: SuppleTable 4
Supplemental Table 4. Correlation coefficient among variables in conditional landmark cohort (N=11,850)
		Radiotherapy	Age	Race	Charlson-Deyo score	cT	cN	Grade	Subtype	Breast surgery	Chemotherapy	Endocrine therapy	Bone metastasis	Lung metastasis	Liver metastasis	Brain metastasis	No. of metastatic sites
Radiotherapy	Cramér's V or R value	1	-0.000462655	-0.016	0.067	-0.119	-0.18	0.045	-0.052	0.032	0.213	0.022	0.089	0.072	0.071	0.057	0.102
	P value		0.978237	0.079	<0.001	<0.001	<0.001	<0.001	<0.001	<0.001	<0.001	0.02	<0.001	<0.001	<0.001	<0.001	<0.001
Age	Cramér's V or R value	-0.000462655	1	-0.093	0.155	-0.019	-0.061	-0.079	-0.062	-0.052	0.221	-0.051	-0.001	-0.085	0.096	0.005	-0.004
	P value	0.978237		<0.001	<0.001	0.054	<0.001	<0.001	<0.001	<0.001	<0.001	<0.001	0.917	<0.001	<0.001	0.621	0.687
Race	Cramér's V or R value	-0.016	-0.093	1	0.026	0.056	0.058	0.08	0.07	0.028	-0.065	0.077	0.062	-0.042	-0.01	0.004	0.018
	P value	0.079	<0.001		0.004	<0.001	<0.001	<0.001	<0.001	0.002	<0.001	<0.001	<0.001	<0.001	0.282	0.695	0.047
Charlson-Deyo score	Cramér's V or R value	0.067	0.155	0.026	1	-0.015	-0.014	-0.01	-0.028	-0.006	0.109	-0.023	0.018	-0.038	0.047	-0.019	-0.012
	P value	<0.001	<0.001	0.004		0.131	0.153	0.281	0.004	0.534	<0.001	0.012	0.05	<0.001	<0.001	0.038	0.192
cT	Cramér's V or R value	-0.119	-0.019	0.056	-0.015	1	0.297	0.121	0.087	0.283	-0.15	0.068	0.042	-0.113	-0.001	-0.019	0.113
	P value	<0.001	0.054	<0.001	0.131		<0.001	<0.001	<0.001	<0.001	<0.001	<0.001	<0.001	<0.001	0.893	0.053	<0.001
cN	Cramér's V or R value	-0.18	-0.061	0.058	-0.014	0.297	1	0.141	0.115	0.162	-0.183	0.093	0.08	0.008	0.025	-0.008	0.069
	P value	<0.001	<0.001	<0.001	0.153	<0.001		<0.001	<0.001	<0.001	<0.001	<0.001	<0.001	0.437	0.00965643	0.403	<0.001
Grade	Cramér's V or R value	0.045	-0.079	0.08	-0.01	0.121	0.141	1	0.344	0.0323345	0.198	0.287	0.187	0.102	0.104	0.038	0.067
	P value	<0.001	<0.001	<0.001	0.281	<0.001	<0.001		<0.001	0.001	<0.001	<0.001	<0.001	<0.001	<0.001	<0.001	<0.001
Subtype	Cramér's V or R value	-0.052	-0.062	0.07	-0.028	0.087	0.115	0.344	1	0.045	-0.33	0.602	0.27	-0.121	-0.136	-0.038	0.03
	P value	<0.001	<0.001	<0.001	0.004	<0.001	<0.001	<0.001		<0.001	<0.001	<0.001	<0.001	<0.001	<0.001	<0.001	0.002
Breast surgery	Cramér's V or R value	0.032	-0.052	0.028	-0.006	0.283	0.162	0.0323345	0.045	1	0.126	0.038	0.032	0.004	0.014	0.011	0.016
	P value	<0.001	<0.001	0.002	0.534	<0.001	<0.001	0.001	<0.001		<0.001	<0.001	0.408731	0.703	0.124	0.25	0.085
Chemotherapy	Cramér's V or R value	0.213	0.221	-0.065	0.109	-0.15	-0.183	0.198	-0.33	0.126	1	0.287	0.159	0.016	0.148	0	-0.053
	P value	<0.001	<0.001	<0.001	<0.001	<0.001	<0.001	<0.001	<0.001	<0.001		<0.001	<0.001	0.081	<0.001	0.974	<0.001
Endocrine therapy	Cramér's V or R value	0.022	-0.051	0.077	-0.023	0.068	0.093	0.287	0.602	0.038	0.287	1	0.259	0.097	0.144	0.047	0.038
	P value	0.02	<0.001	<0.001	0.012	<0.001	<0.001	<0.001	<0.001	<0.001	<0.001		<0.001	<0.001	<0.001	<0.001	<0.001
Bone metastasis	Cramér's V or R value	0.089	-0.001	0.062	0.018	0.042	0.08	0.187	0.27	0.032	0.159	0.259	1	0.253	0.184	0.035	-0.199
	P value	<0.001	0.917	<0.001	0.05	<0.001	<0.001	<0.001	<0.001	0.408731	<0.001	<0.001		<0.001	<0.001	<0.001	<0.001
Lung metastasis	Cramér's V or R value	0.072	-0.085	-0.042	-0.038	-0.113	0.008	0.102	-0.121	0.004	0.016	0.097	0.253	1	0.039	0.033	-0.388
	P value	<0.001	<0.001	<0.001	<0.001	<0.001	0.437	<0.001	<0.001	0.703	0.081	<0.001	<0.001		<0.001	<0.001	<0.001
Liver metastasis	Cramér's V or R value	0.071	0.096	-0.01	0.047	-0.001	0.025	0.104	-0.136	0.014	0.148	0.144	0.184	0.039	1	0.01	-0.38
	P value	<0.001	<0.001	0.282	<0.001	0.893	0.00965643	<0.001	<0.001	0.124	<0.001	<0.001	<0.001	<0.001		0.285	<0.001
Brain metastasis	Cramér's V or R value	0.057	0.005	0.004	-0.019	-0.019	-0.008	0.038	-0.038	0.011	0	0.047	0.035	0.033	0.01	1	-0.211
	P value	<0.001	0.621	0.695	0.038	0.053	0.403	<0.001	<0.001	0.25	0.974	<0.001	<0.001	<0.001	0.285		<0.001
No. of metastatic sites	Cramér's V or R value	0.102	-0.004	0.018	-0.012	0.113	0.069	0.067	0.03	0.016	-0.053	0.038	-0.199	-0.388	-0.38	-0.211	1
	P value	<0.001	0.687	0.047	0.192	<0.001	<0.001	<0.001	0.002	0.085	<0.001	<0.001	<0.001	<0.001	<0.001	<0.001
cT; clinical T, cN; clinical N
